# Supplementary material for: Factors influencing Al3+-dimer speciation and stability from density functional theory calculations
Source: Royal Society of Chemistry journal article supplement (doi:10.1039/c2cp40885f), 2012-01-01
Supplement: c2cp40885f.pdf [file c2cp40885f.pdf]

# **Al<sup>3+</sup>-Dimer Speciation and Stability From Density Functional Theory Calculations.**

## **Electronic Supplementay Information**

*Stuart Bogatko, Paul Geerlings*

Eenheid Algemene Chemie, Vrije Universiteit Brussel (VUB), Faculteit Wetenschappen,  
Pleinlaan 2,  
1050 Brussels, Belgium.

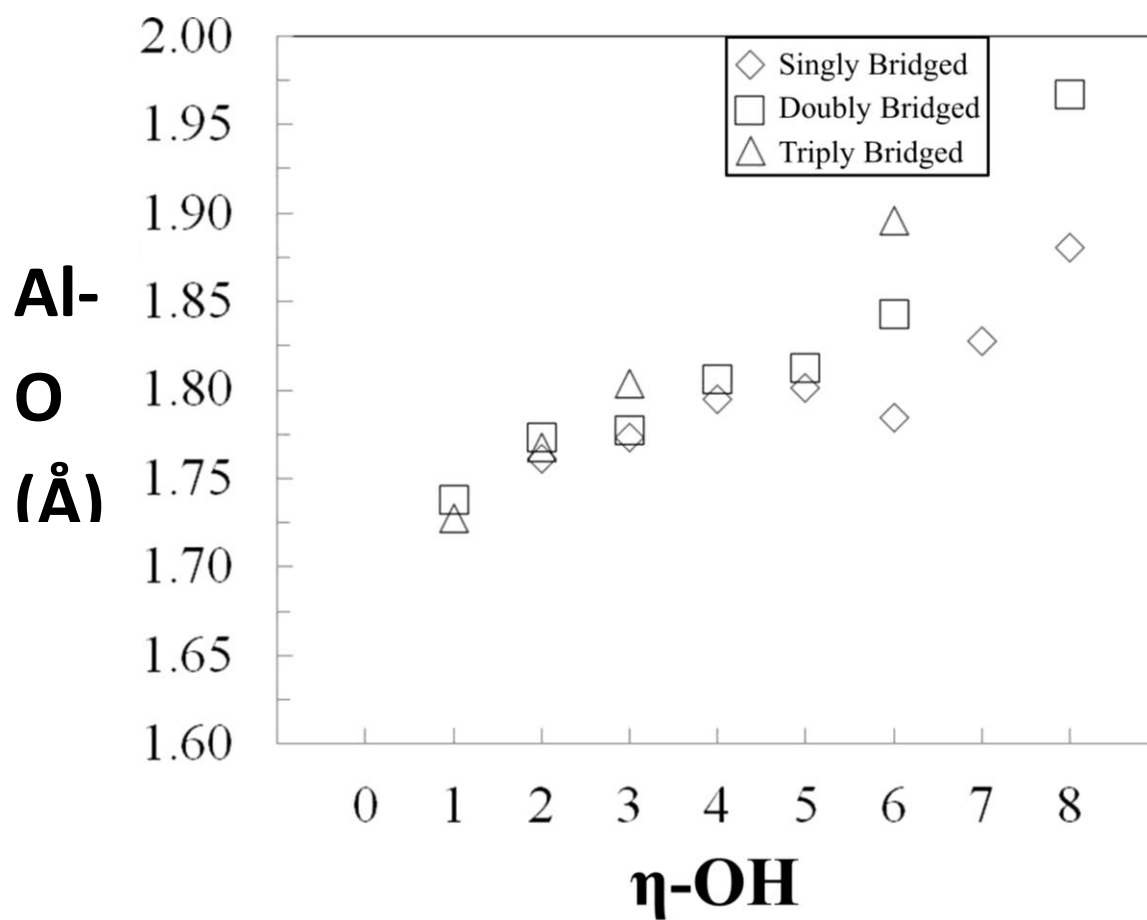

Figure S-1. Al-O distances for the  $\eta$ -OH ligands as a function of number of  $\eta$ -OH ligands for the singly (diamonds), doubly (squares), and triply (triangles) bridged  $\text{Al}^{3+}$ -Dimer complexes.

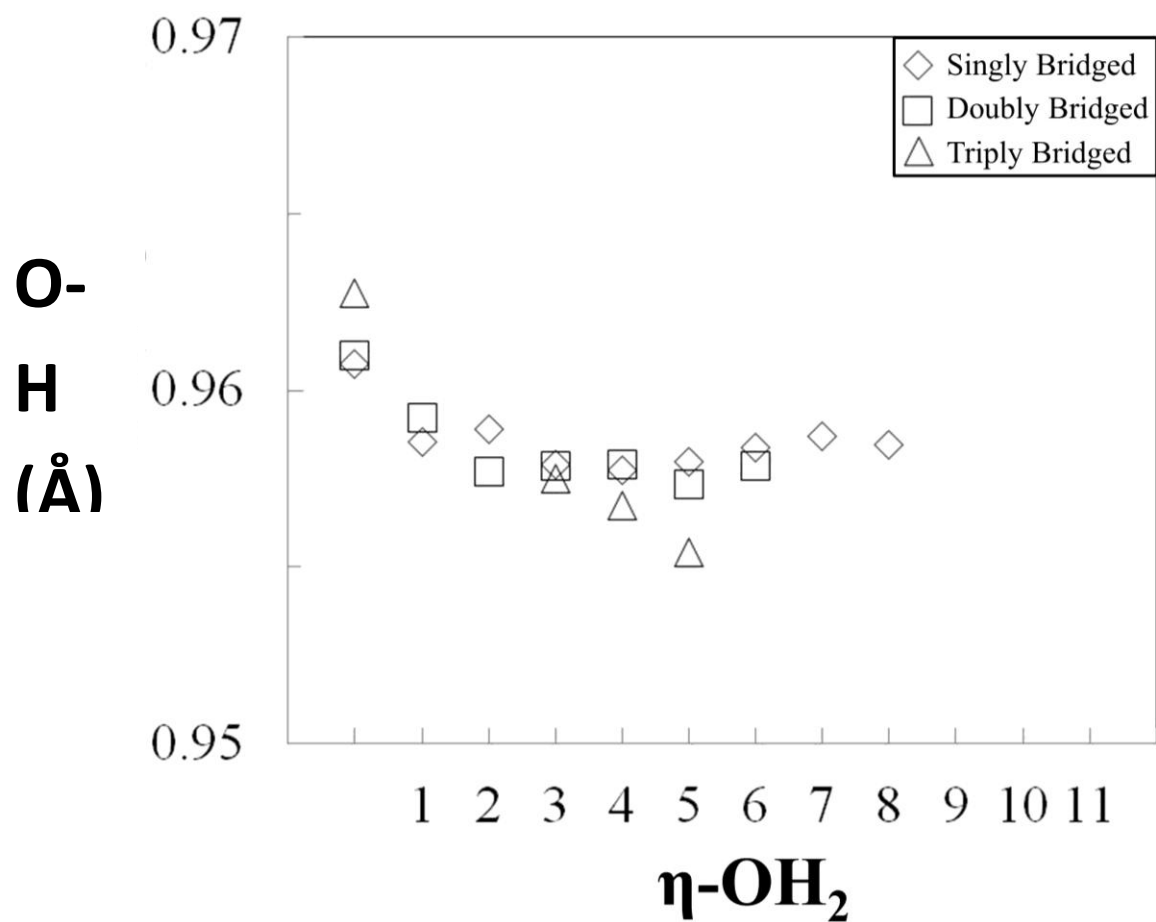

Figure S-2. Hydroxide O-H distances for the  $\eta$ -OH ligands as a function of number of  $\eta$ -OH ligands for the singly (diamonds), doubly (squares), and triply (triangles) bridged  $\text{Al}^{3+}$ -Dimer complexes.

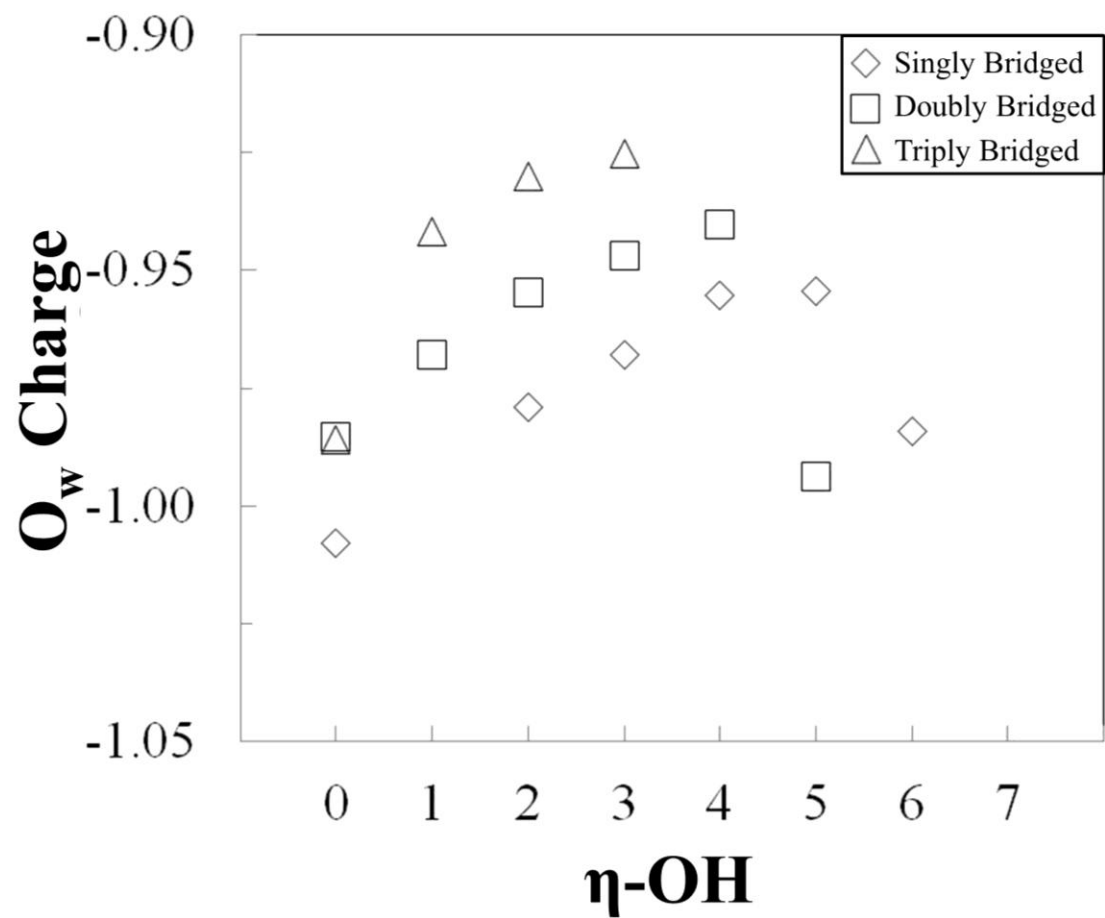

Figure S-3. Average water O Natural Charges as a function of the number of  $\eta$ -OH ligands for the singly (diamonds), doubly (squares), and triply (triangles) bridged  $\text{Al}^{3+}$ -Dimer complexes.

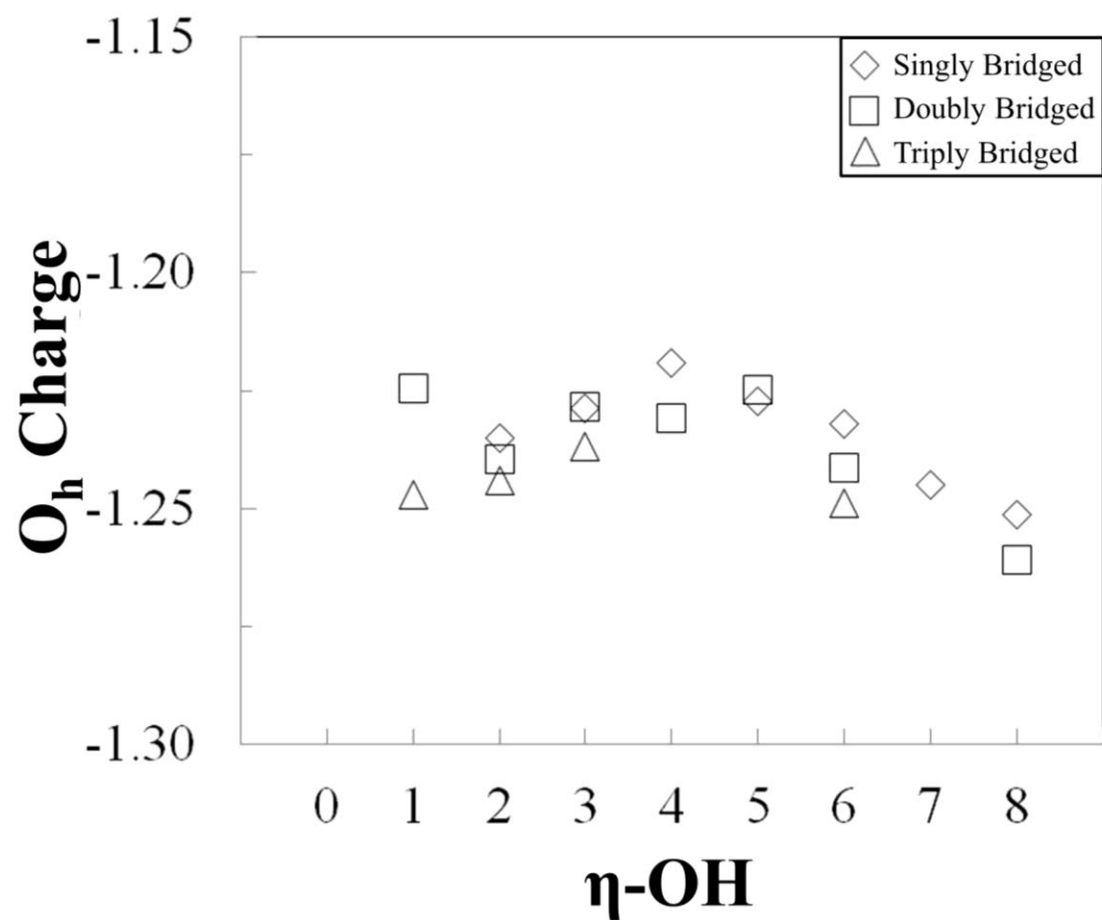

Figure S-4. Average hydroxide O Natural Charges as a function of number of  $\eta$ -OH ligands for the singly (diamonds), doubly (squares), and triply (triangles) bridged  $Al^{3+}$ -Dimer complexes.

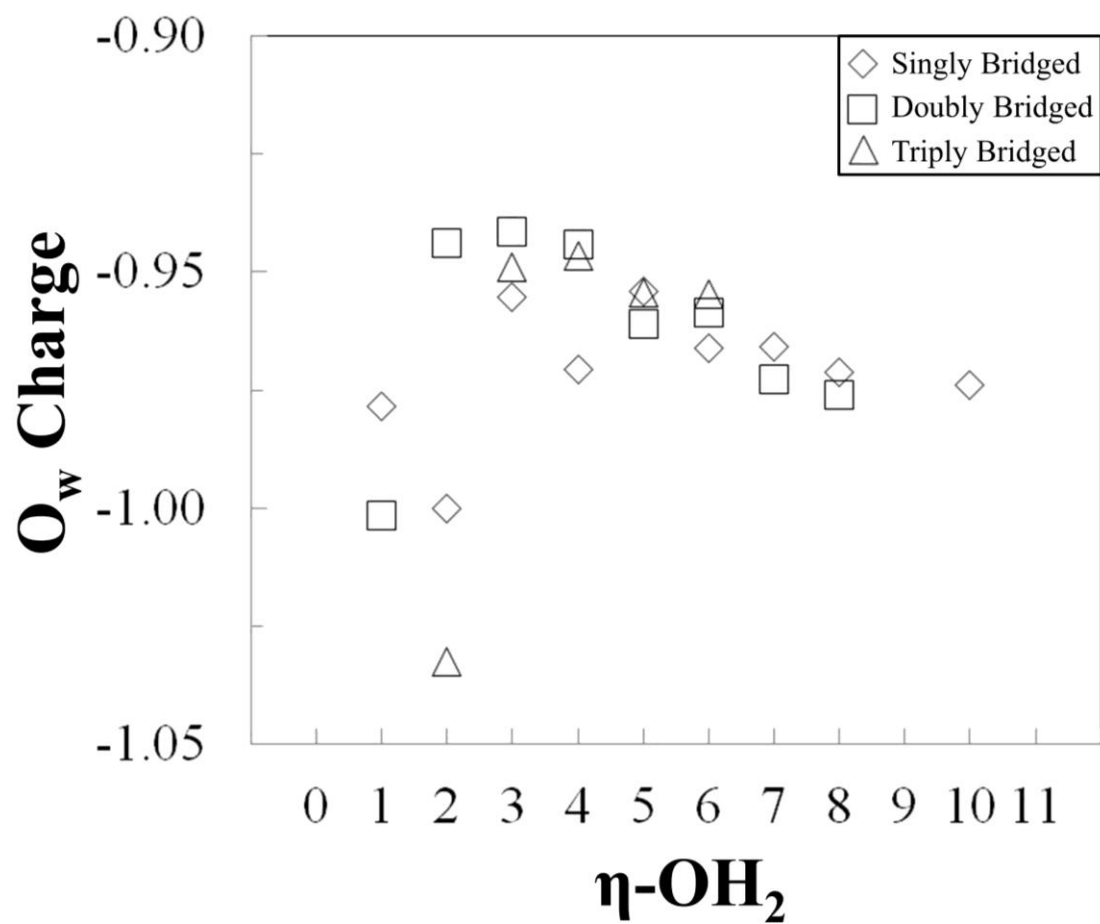

Figure S-5. Average water O Natural Charges as a function of number of  $\eta\text{-OH}_2$  ligands for the singly (diamonds), doubly (squares), and triply (triangles) bridged Al<sup>3+</sup>-Dimer complexes.

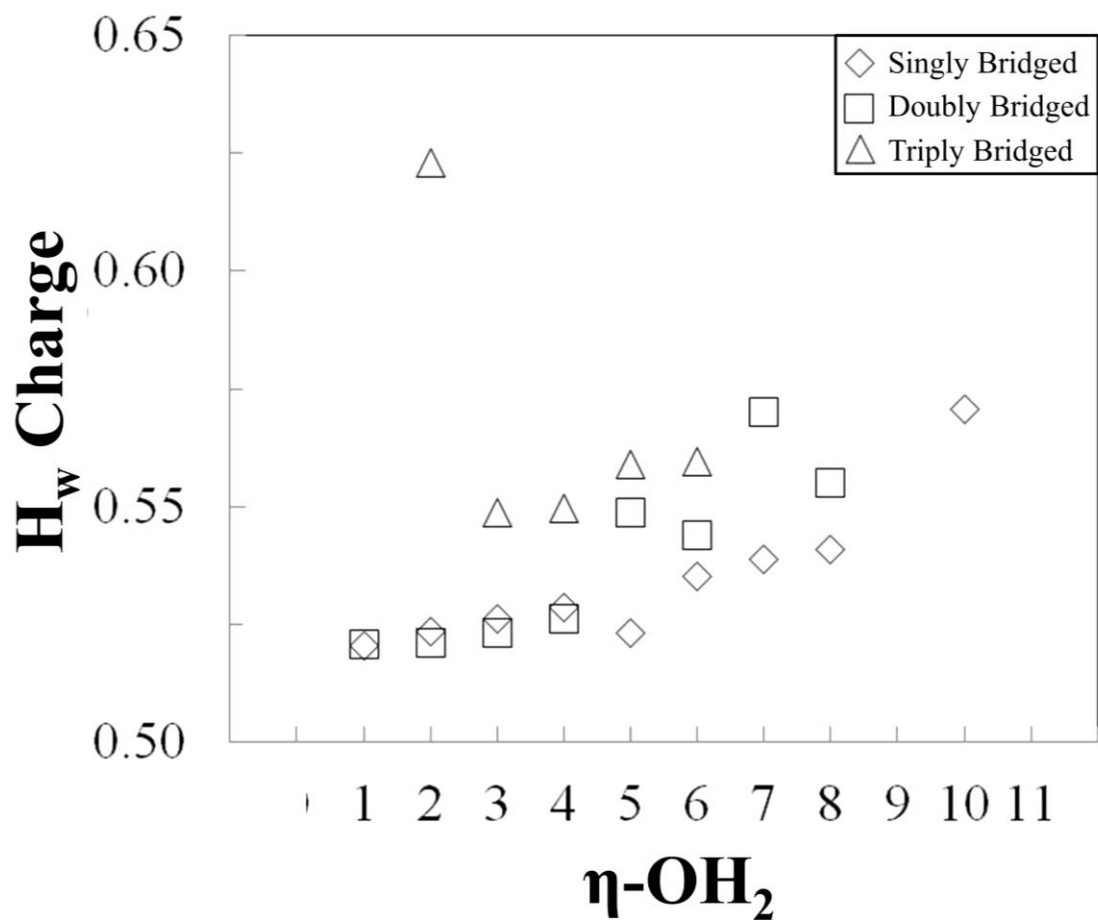

Figure S-6. Average water H Natural Charges as a function of number of  $\eta$ -OH<sub>2</sub> ligands for the singly (diamonds), doubly (squares), and triply (triangles) bridged Al<sup>3+</sup>-Dimer complexes.

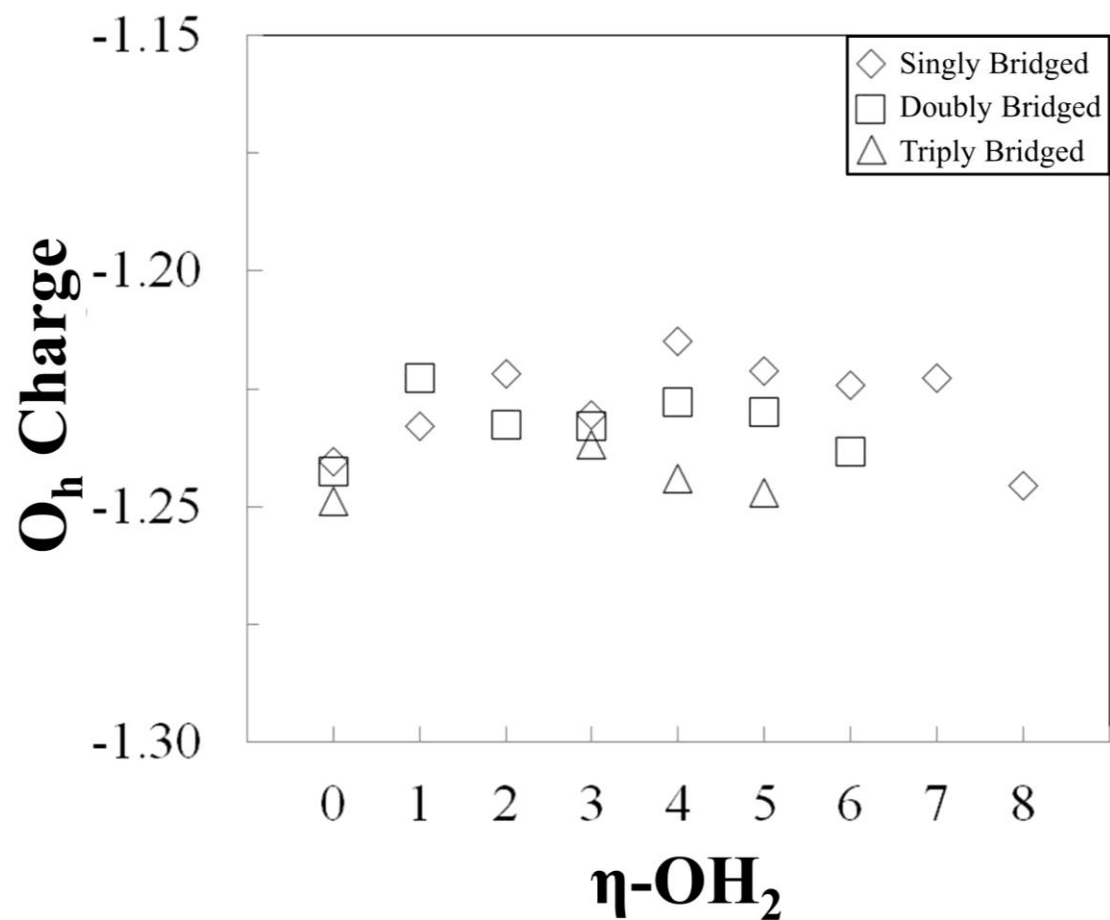

Figure S-7. Average hydroxide O Natural Charges as a function of number of  $\eta$ -OH<sub>2</sub> ligands for the singly (diamonds), doubly (squares), and triply (triangles) bridged Al<sup>3+</sup>-Dimer complexes.



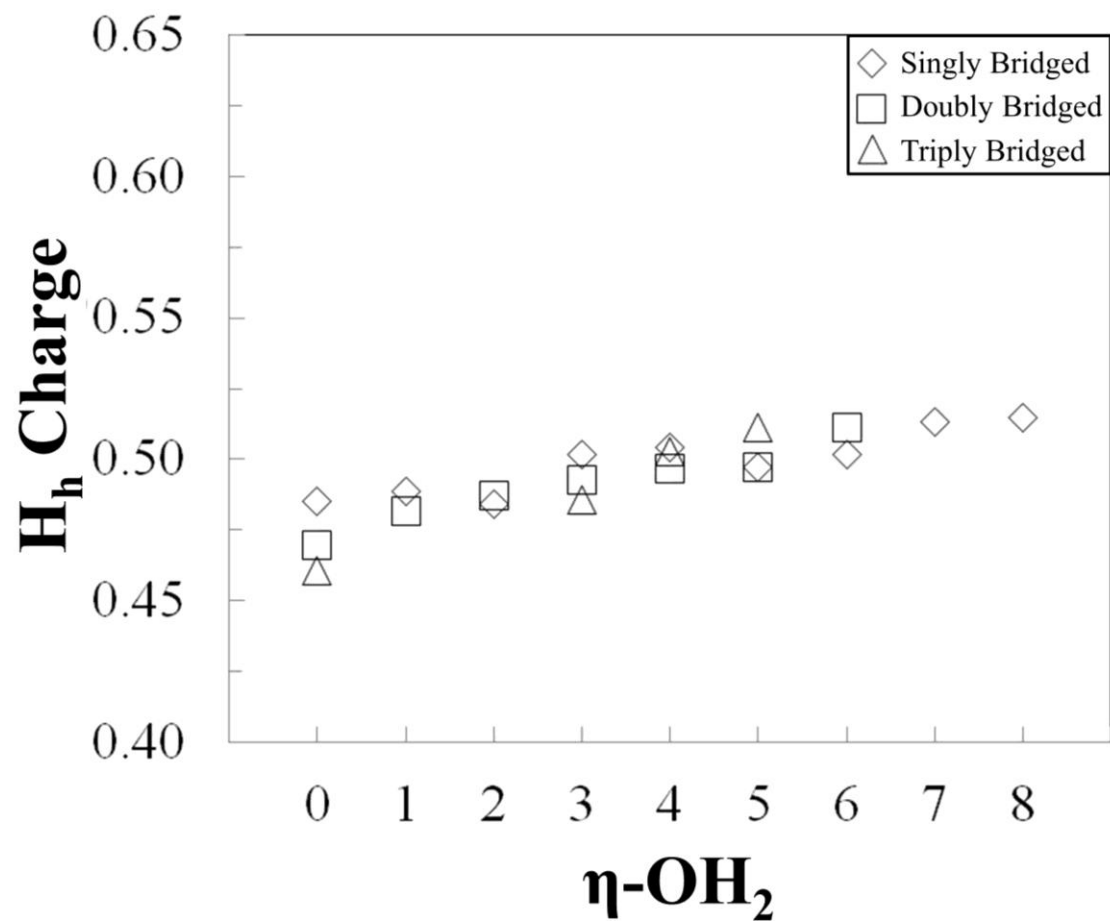

Figure S-8. Average hydroxide H Natural Charges as a function of number of  $\eta$ -OH<sub>2</sub> ligands for the singly (diamonds), doubly (squares), and triply (triangles) bridged Al<sup>3+</sup>-Dimer complexes.

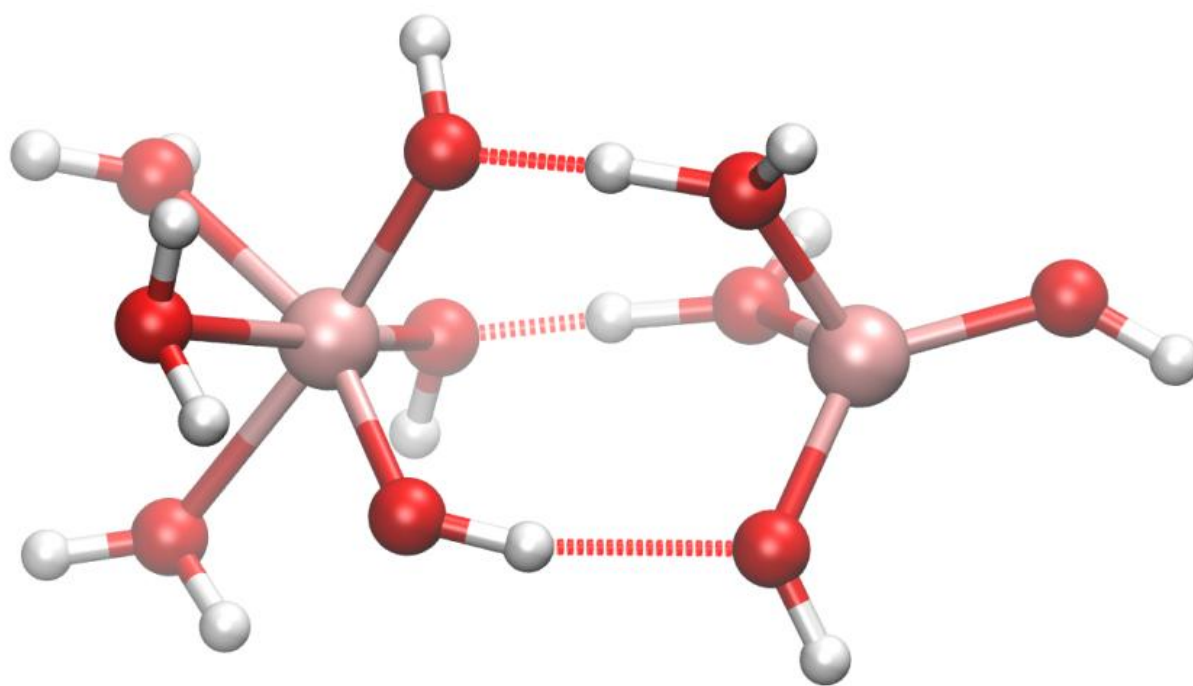

Figure S-9. HB-Bridged Al-Dimer species.
